# Supplementary material
Source: PubMed Central journal article supplement (PMC5684980)
Supplement: CPH711960_app_1_online_supp.pdf [file CPH711960_app_1_online_supp.pdf]

# Appendix 1:

## Survey Questions

### 1. Select your gender

- Female
- Male

### 2. What is your primary work setting? (select one)

- Community Pharmacy
- Hospital Pharmacy
- Primary Care Network
- Academia/University Affiliation
- Industry
- Retired
- Other

### 3. What is the population of the area where you currently practice?

- Rural (population < 1,000)
- Small population centre (population between 1,000 and 29,999)
- Medium population centre (population between 30,000 and 99,999)
- Large urban population (population ≥ 100,000)

### 4. On average, how many hours do you work per week?

- Full-time (≥ 30 hours per week)
- Part-time (< 30 hours per week)
- Casual

### 5. Which age group do you belong to?

- 20 to 29 years old
- 30 to 39 years old
- 40 to 49 years old
- 50 to 59 years old
- 60 to 69 years old
- ≥ 70 years old

### 6. What is your current level of education? (click all that apply)

- Bachelor of Science in Pharmacy
- Pharmacy Practice Residency (Hospital or Community)
- Masters
- PharmD
- PhD
- Fellowship

### 7. What additional authorizations do you currently have? (Click all that apply. Please click other if you have no additional authorizations)

- Additional Prescribing Authorizations (APA)
- Administer Drugs by Injection
- Ability to Order Labs (PRAC ID)
- Other (CDE, CGP, CAE, etc.)

**8. How many years have you been in practice?**

- 0 to 5 years
- 6 to 10 years
- 11 to 15 years
- 16 to 20 years
- 21 to 25 years
- 26 to 30 years
- 31 to 35 years
- ≥ 36 years

**9. Have you completed the Take Home Naloxone (THN) program training requirements?**

- Yes
- No
- Was not aware there was a THN training program

**10. Did you feel the Take Home Naloxone (THN) training program was sufficient?**

- Yes
- No
- Have no completed the THN training program

**11. Pharmacists should be screening patients to identify those at risk of opioid overdose.**

- Strongly Disagree
- Disagree
- Neutral
- Agree
- Strongly Agree

**12. Pharmacists should be recommending and/or prescribing Take Home Naloxone (THN) kits for patients at high risk for opioid overdose.**

- Strongly Disagree
- Disagree
- Neutral
- Agree
- Strongly Agree

**13. How confident are you in your ability to provide education/counsel on the Take Home Naloxone (THN) kit?**

- Not at all confident
- Not very confident
- Somewhat confident
- Confident
- Very confident

**14. How willing are you to participate in the Take Home Naloxone (THN) program?**

- Not at all willing
- A little willing
- Moderately willing
- Very willing
- Extremely willing

**15. How comfortable are you engaging in conversation on the Take Home Naloxone (THN) program with a patient?**

- Not at all comfortable
- Slightly comfortable
- Somewhat comfortable
- Comfortable
- Very Comfortable

**16. Are you already participating in the Take Home Naloxone (THN) program?**

- Yes
- No

**17. What do you perceive as the THREE most important barriers to implementing the Take Home Naloxone (THN) program in your area?**

- Lack of education about the program
- Lack of time in current work environment
- Lack of support from management or organization
- Fear of legal liability
- Belief that the THN is enabling drug abuse
- Fear of attracting drug seeking clientele
- You do not see patients with opioid drug use in your practice setting
- Insufficient financial compensation for service
- No perceived barriers to the THN program
- Other (Free Text Option)

**18. Do you or your pharmacy currently participate in other harm reduction initiatives? (Examples include needle exchange, opioid substitution program such as methadone, smoking cessation counselling, etc.)**

- Yes
- No
- Not applicable

**19. Optional: Please provide any additional comments regarding your perception of the Take Home Naloxone program that you feel is pertinent (Free Text Option)**
